# Supplementary material
Source: Research Square preprint supplement (doi:10.21203/rs.3.rs-9232484/v1)
Supplement: Supplementary file 1 [file 80f3c531d084a30a457e350e.xlsx]

## Sheet: Information
Article Title:	Modelling the Effects of Material Deprivation on Social and Occupational Outcomes in Healthy and Psychosis Experiencing Individuals
Journal Name:	Social Psychiatry and Psychiatric Epidemiology
Author Names:	Aodán Laighneach1,2,3, Mia Casburn1,3, Fergus Quilligan1,3, Evie Doherty1,2,3, Emma Corley1,3, Pilib Ó Broin1,5, Gary Donohoe1,4, Derek W. Morris1,2*, Dara M. Cannon1,3*
Affilations:	1Centre for Neuroimaging, Cognition and Genomics (NICOG) and Institute for Health Discovery and Innovation, University of Galway, Ireland, 2School of Biological and Chemical Sciences, University of Galway, Ireland, 3Clinical Neuroimaging Laboratory, School of Medicine, University of Galway, Ireland, 4School of Psychology, University of Galway, Ireland, 5School of Mathematical and Statistical Scie…
Corresponding author email:	aodan.laighneach@universityofgalway.ie

## Sheet: Supplementary Table 1
Supplementary Table 1: Regression Results
participant.p22189 = Townsend Deprivation Index
participant.p21003_i2 = Age at instance 2
participant.p31 = Sex
SP = Social Participation; OF = Occupational Function
Social Participation	Occupational Function	NEET Status (Logistic Regression)
Formula = SP ~ participant.p22189 + participant.p21003_i2 + participant.p31	Formula = OF ~ participant.p22189 + participant.p21003_i2 + participant.p31	Formula = NEET ~ participant.p22189 + participant.p21003_i2 + participant.p31
Residuals:	Residuals:
Min 1Q Median 3Q Max	Min 1Q Median 3Q Max
-5.0998 -0.9291 0.0715 1.0244 5.3941	-2.93078 -0.02726 0.00878 0.03307 2.12228
Coefficients:	Coefficients:	Coefficients:
Estimate Standardized Std. Error t value Pr(>|t|)	Estimate Standardized Std. Error t value Pr(>|t|)	Estimate Std. Error z value Pr(>|z|)
(Intercept) 2.959022 NA 0.073356 40.34 <2e-16 ***	(Intercept) 0.9459692 NA 0.0363705 26.009 < 2e-16 ***	(Intercept) -4.235727 0.359409 -11.785 < 2e-16 ***
participant.p22189 -0.029174 -0.051285 0.003304 -8.83 <2e-16 ***	participant.p22189 -0.0087442 -0.0657228 0.0012861 -6.799 1.11e-11 ***	participant.p22189 0.013663 0.012790 1.068 0.285
participant.p21003_i2 0.026446 0.135792 0.001135 23.30 <2e-16 ***	participant.p21003_i2 0.0010245 0.0158245 0.0006278 1.632 0.103	participant.p21003_i2 0.036578 0.006118 5.978 2.25e-09 ***
participant.p31 -0.500488 -0.166637 0.017460 -28.66 <2e-16 ***	participant.p31 -0.0553561 -0.0735489 0.0072978 -7.585 3.59e-14 ***	participant.p31 -0.921232 0.080910 -11.386 < 2e-16 ***
---	---	---
Signif. codes: 0 ‘***’ 0.001 ‘**’ 0.01 ‘*’ 0.05 ‘.’ 0.1 ‘ ’ 1	Signif. codes: 0 ‘***’ 0.001 ‘**’ 0.01 ‘*’ 0.05 ‘.’ 0.1 ‘ ’ 1	Signif. codes: 0 ‘***’ 0.001 ‘**’ 0.01 ‘*’ 0.05 ‘.’ 0.1 ‘ ’ 1
Residual standard error: 1.466 on 28429 degrees of freedom	Residual standard error: 0.3737 on 10597 degrees of freedom	(Dispersion parameter for binomial family taken to be 1)
(24 observations deleted due to missingness)	(14 observations deleted due to missingness)
Multiple R-squared: 0.04589, Adjusted R-squared: 0.04578	Multiple R-squared: 0.009829, Adjusted R-squared: 0.009549	Null deviance: 5782.2 on 10600 degrees of freedom
F-statistic: 455.7 on 3 and 28429 DF, p-value: < 2.2e-16	F-statistic: 35.06 on 3 and 10597 DF, p-value: < 2.2e-16	Residual deviance: 5614.8 on 10597 degrees of freedom
		(14 observations deleted due to missingness)
		AIC: 5622.8
		Number of Fisher Scoring iterations: 5

## Sheet: Supplementary Table 2
Supplementary Table 2: Confirmatory Factor analysis
g = General Intelligence
participant.p6373_i2 = matrix pattern completion instance 2
participant.p23324_i2 = symbol-digit substitution instance 2
participant.p20016_i2 = Fluid inteliligence instance 2
participant.p6350_i2 = alphanumeric trail making instance 2
lhs = left hand side; rhs = right hand side; op = operator; est.std = standardised estimate; se = standard error; z = Z-statistic; ci = confidence interval
CFA g factor - standardised
lhs	op	rhs	est.std	se	z	pvalue	ci.lower	ci.upper
g	=~	participant.p23324_i2	0.613646	0.00793224	77.361	0	0.598099	0.629193
g	=~	participant.p6373_i2	0.558925	0.00846541	66.0246	0	0.542334	0.575517
g	=~	participant.p20016_i2	0.519655	0.00864046	60.1421	0	0.50272	0.53659
g	=~	participant.p6350_i2	-0.554959	0.00771605	-71.9226	0	-0.570082	-0.539836
participant.p6373_i2	~~	participant.p20016_i2	0.15755	0.010153	15.5176	0	0.137651	0.17745
participant.p23324_i2	~~	participant.p23324_i2	0.623438	0.00973518	64.0397	0	0.604358	0.642519
participant.p6373_i2	~~	participant.p6373_i2	0.687602	0.00946307	72.6617	0	0.669055	0.706149
participant.p20016_i2	~~	participant.p20016_i2	0.729958	0.00898013	81.286	0	0.712357	0.747559
participant.p6350_i2	~~	participant.p6350_i2	0.692021	0.00856418	80.8041	0	0.675235	0.708806

## Sheet: Supplementary Table 3
Supplementary Table 3: Mediation analyses, brain MRI factors
participant.p21003_i2 = Age at instance 2
participant.p31 = Sex
SP = Social Participation; OF = Occupational Function
SBN = Social Brain Network
lhs = left hand side; rhs = right hand side; op = operator; est.std = standardised estimate; se = standard error; z = Z-statistic; ci = confidence interval
TDI -> SBN_mean_cortical_volume -> SP											TDI -> SBN_mean_cortical_volume -> OF											TDI -> SBN_mean_subcortical_volume -> SP											TDI -> SBN_mean_subcortical_volume -> OF											TDI -> SBN_mean_FA -> SP
lhs	op	rhs	label	est.std	se	z	pvalue	ci.lower	ci.upper		lhs	op	rhs	label	est.std	se	z	pvalue	ci.lower	ci.upper		lhs	op	rhs	label	est.std	se	z	pvalue	ci.lower	ci.upper		lhs	op	rhs	label	est.std	se	z	pvalue	ci.lower	ci.upper		lhs	op	rhs	label	est.std	se
<chr>	<chr>	<chr>	<chr>	<dbl>	<dbl>	<dbl>	<dbl>	<dbl>	<dbl>		<chr>	<chr>	<chr>	<chr>	<dbl>	<dbl>	<dbl>	<dbl>	<dbl>	<dbl>		<chr>	<chr>	<chr>	<chr>	<dbl>	<dbl>	<dbl>	<dbl>	<dbl>	<dbl>		<chr>	<chr>	<chr>	<chr>	<dbl>	<dbl>	<dbl>	<dbl>	<dbl>	<dbl>		<chr>	<chr>	<chr>	<chr>	<dbl>	<dbl>
SP	~	participant.p22189	c	-0.050922	0.00591687	-8.60624	0	-0.0625189	-0.0393252		OF	~	participant.p22189	c	-0.0913157	0.0159736	-5.71668	1.08626e-08	-0.122623	-0.0600081		SP	~	participant.p22189	c	-0.0507447	0.00591876	-8.57354	0	-0.0623453	-0.0391442		OF	~	participant.p22189	c	-0.0908687	0.0159829	-5.68537	1.30529e-08	-0.122195	-0.0595428		SP	~	participant.p22189	c	-0.0504462	0.00598721
SP	~	participant.p21003_i2		0.148317	0.00623894	23.7727	0	0.136088	0.160545		OF	~	participant.p21003_i2		0.0464437	0.0191469	2.42565	0.0152811	0.00891639	0.0839709		SP	~	participant.p21003_i2		0.147829	0.00624309	23.6788	0	0.135593	0.160065		OF	~	participant.p21003_i2		0.047248	0.0191758	2.46393	0.0137422	0.00966403	0.084832		SP	~	participant.p21003_i2		0.142169	0.00631143
SP	~	participant.p31		-0.18983	0.00705114	-26.9219	0	-0.20365	-0.17601		OF	~	participant.p31		-0.210701	0.0221542	-9.51064	0	-0.254123	-0.16728		SP	~	participant.p31		-0.187412	0.0068992	-27.1644	0	-0.200934	-0.17389		OF	~	participant.p31		-0.206102	0.0215956	-9.5437	0	-0.248428	-0.163775		SP	~	participant.p31		-0.170453	0.00597603
SBN_mean_cortical_volume	~	participant.p22189	a	-0.0220023	0.00474102	-4.64084	3.47003e-06	-0.0312945	-0.0127101		SBN_mean_cortical_volume	~	participant.p22189	a	-0.0207585	0.0078288	-2.65155	0.00801238	-0.0361026	-0.00541427		SBN_mean_subcortical_volume	~	participant.p22189	a	-0.0285811	0.00485189	-5.89072	3.84521e-09	-0.0380906	-0.0190716		SBN_mean_subcortical_volume	~	participant.p22189	a	-0.0270336	0.00810205	-3.33663	0.000847993	-0.0429133	-0.0111538		SBN_mean_FA	~	participant.p22189	a	-0.00900438	0.00582199
SBN_mean_cortical_volume	~	participant.p21003_i2		-0.261846	0.00462857	-56.5716	0	-0.270918	-0.252774		SBN_mean_cortical_volume	~	participant.p21003_i2		-0.161861	0.00771668	-20.9755	0	-0.176986	-0.146737		SBN_mean_subcortical_volume	~	participant.p21003_i2		-0.268335	0.00467028	-57.4557	0	-0.277488	-0.259181		SBN_mean_subcortical_volume	~	participant.p21003_i2		-0.177547	0.00800607	-22.1766	0	-0.193239	-0.161855		SBN_mean_FA	~	participant.p21003_i2		-0.296452	0.00509599
SBN_mean_cortical_volume	~	participant.p31		0.544042	0.00375567	144.859	0	0.536681	0.551403		SBN_mean_cortical_volume	~	participant.p31		0.564186	0.00602668	93.6147	0	0.552374	0.575998		SBN_mean_subcortical_volume	~	participant.p31		0.516088	0.0039214	131.608	0	0.508402	0.523774		SBN_mean_subcortical_volume	~	participant.p31		0.527056	0.00634835	83.0226	0	0.514614	0.539499		SBN_mean_FA	~	participant.p31		0.109923	0.00578607
SP	~	SBN_mean_cortical_volume	b	0.0376895	0.00731259	5.15406	2.54908e-07	0.0233571	0.0520219		OF	~	SBN_mean_cortical_volume	b	0.0834851	0.0203373	4.10503	4.04267e-05	0.0436248	0.123345		SP	~	SBN_mean_subcortical_volume	b	0.0350383	0.00716169	4.89245	9.95868e-07	0.0210016	0.0490749		OF	~	SBN_mean_subcortical_volume	b	0.0806398	0.019498	4.1358	3.53726e-05	0.0424244	0.118855		SP	~	SBN_mean_FA	b	0.00399718	0.00630437
SP	|	t1		-1.42233	0.0599827	-23.7123	0	-1.53989	-1.30476		OF	|	t1		-3.22031	0.275186	-11.7023	0	-3.75967	-2.68096		SP	|	t1		-1.42499	0.0600272	-23.739	0	-1.54264	-1.30733		OF	|	t1		-3.20993	0.27545	-11.6534	0	-3.7498	-2.67005		SP	|	t1		-1.45276	0.061159
SP	|	t2		-0.803203	0.0546091	-14.7082	0	-0.910235	-0.696171		OF	|	t2		-1.67453	0.19031	-8.79895	0	-2.04753	-1.30153		SP	|	t2		-0.805857	0.0546571	-14.7439	0	-0.912983	-0.698731		OF	|	t2		-1.66414	0.190657	-8.72842	0	-2.03782	-1.29045		SP	|	t2		-0.836749	0.0558555
SP	|	t3		-0.216356	0.0531616	-4.06979	4.70564e-05	-0.320551	-0.112161		OF	|	t3		-1.63091	0.190147	-8.57709	0	-2.00359	-1.25823		SP	|	t3		-0.219006	0.0532079	-4.11605	3.85423e-05	-0.323292	-0.114721		OF	|	t3		-1.62052	0.190491	-8.50704	0	-1.99387	-1.24716		SP	|	t3		-0.248701	0.0544408
SP	|	t4		0.403058	0.0523121	7.70487	1.31006e-14	0.300528	0.505588		OF	|	t4		2.15965	0.189735	11.3825	0	1.78778	2.53153		SP	|	t4		0.400415	0.0523619	7.64708	2.06502e-14	0.297788	0.503043		OF	|	t4		2.17004	0.190066	11.4173	0	1.79752	2.54257		SP	|	t4		0.369645	0.0535933
SP	|	t5		1.07581	0.0519288	20.717	0	0.974032	1.17759		OF	|	t5		2.89826	0.188973	15.337	0	2.52788	3.26864		SP	|	t5		1.07318	0.051977	20.6472	0	0.97131	1.17506		OF	|	t5		2.90865	0.189303	15.3651	0	2.53763	3.27968		SP	|	t5		1.03969	0.0532114
SP	|	t6		1.78293	0.0517759	34.4356	0	1.68145	1.88441		OF	~~	OF		0.959599	0.00703397	136.424	0	0.945813	0.973385		SP	|	t6		1.78023	0.0518252	34.3507	0	1.67866	1.88181		OF	~~	OF		0.959682	0.00701967	136.713	0	0.945924	0.97344		SP	|	t6		1.74442	0.0530702
SP	|	t7		2.51223	0.0520934	48.2255	0	2.41013	2.61433		SBN_mean_cortical_volume	~~	SBN_mean_cortical_volume		0.669195	0.00682295	98.0801	0	0.655823	0.682568		SP	|	t7		2.50954	0.0521427	48.1284	0	2.40734	2.61174		SBN_mean_subcortical_volume	~~	SBN_mean_subcortical_volume		0.704465	0.00677668	103.954	0	0.691183	0.717747		SP	|	t7		2.47344	0.0533624
SP	|	t8		3.24549	0.0537644	60.365	0	3.14011	3.35086		participant.p22189	~~	participant.p22189		1	0	NA	NA	1	1		SP	|	t8		3.2428	0.0538123	60.2614	0	3.13733	3.34828		participant.p22189	~~	participant.p22189		1	0	NA	NA	1	1		SP	|	t8		3.21728	0.0551688
SP	|	t9		4.08681	0.0702469	58.1779	0	3.94913	4.22449		participant.p22189	~~	participant.p21003_i2		-0.00992235	0	NA	NA	-0.00992235	-0.00992235		SP	|	t9		4.08413	0.0702804	58.112	0	3.94639	4.22188		participant.p22189	~~	participant.p21003_i2		-0.00992235	0	NA	NA	-0.00992235	-0.00992235		SP	|	t9		4.04896	0.0718743
SP	|	t10		5.06322	0.236015	21.453	0	4.60064	5.5258		participant.p22189	~~	participant.p31		-4.69093e-05	0	NA	NA	-4.69093e-05	-4.69093e-05		SP	|	t10		5.06055	0.23603	21.4403	0	4.59794	5.52316		participant.p22189	~~	participant.p31		-4.69093e-05	0	NA	NA	-4.69093e-05	-4.69093e-05		SP	|	t10		5.01996	0.236235
SP	~~	SP		0.951592	0.00252775	376.457	0	0.946638	0.956546		participant.p21003_i2	~~	participant.p21003_i2		1	0	NA	NA	1	1		SP	~~	SP		0.95169	0.00252539	376.849	0	0.94674	0.95664		participant.p21003_i2	~~	participant.p21003_i2		1	0	NA	NA	1	1		SP	~~	SP		0.951902	0.00255474
SBN_mean_cortical_volume	~~	SBN_mean_cortical_volume		0.658835	0.00414793	158.835	0	0.650705	0.666964		participant.p21003_i2	~~	participant.p31		0.0770147	0	NA	NA	0.0770147	0.0770147		SBN_mean_subcortical_volume	~~	SBN_mean_subcortical_volume		0.684231	0.00412754	165.772	0	0.676141	0.692321		participant.p21003_i2	~~	participant.p31		0.0770147	0	NA	NA	0.0770147	0.0770147		SBN_mean_FA	~~	SBN_mean_FA		0.905879	0.00318721
participant.p22189	~~	participant.p22189		1	0	NA	NA	1	1		participant.p31	~~	participant.p31		1	0	NA	NA	1	1		participant.p22189	~~	participant.p22189		1	0	NA	NA	1	1		participant.p31	~~	participant.p31		1	0	NA	NA	1	1		participant.p22189	~~	participant.p22189		1	0
participant.p22189	~~	participant.p21003_i2		-0.0712795	0	NA	NA	-0.0712795	-0.0712795		OF	~*~	OF		1	0	NA	NA	1	1		participant.p22189	~~	participant.p21003_i2		-0.0712369	0	NA	NA	-0.0712369	-0.0712369		OF	~*~	OF		1	0	NA	NA	1	1		participant.p22189	~~	participant.p21003_i2		-0.0713328	0
participant.p22189	~~	participant.p31		-0.0127879	0	NA	NA	-0.0127879	-0.0127879		OF	~1			0	0	NA	NA	0	0		participant.p22189	~~	participant.p31		-0.0127603	0	NA	NA	-0.0127603	-0.0127603		OF	~1			0	0	NA	NA	0	0		participant.p22189	~~	participant.p31		-0.00980032	0
participant.p21003_i2	~~	participant.p21003_i2		1	0	NA	NA	1	1		SBN_mean_cortical_volume	~1			1.33236	0.0782714	17.0224	0	1.17895	1.48577		participant.p21003_i2	~~	participant.p21003_i2		1	0	NA	NA	1	1		SBN_mean_subcortical_volume	~1			1.50822	0.080957	18.6299	0	1.34955	1.66689		participant.p21003_i2	~~	participant.p21003_i2		1	0
participant.p21003_i2	~~	participant.p31		0.0819514	0	NA	NA	0.0819514	0.0819514		participant.p22189	~1			-0.583476	0	NA	NA	-0.583476	-0.583476		participant.p21003_i2	~~	participant.p31		0.0818918	0	NA	NA	0.0818918	0.0818918		participant.p22189	~1			-0.583476	0	NA	NA	-0.583476	-0.583476		participant.p21003_i2	~~	participant.p31		0.0853904	0
participant.p31	~~	participant.p31		1	0	NA	NA	1	1		participant.p21003_i2	~1			9.97816	0	NA	NA	9.97816	9.97816		participant.p31	~~	participant.p31		1	0	NA	NA	1	1		participant.p21003_i2	~1			9.97816	0	NA	NA	9.97816	9.97816		participant.p31	~~	participant.p31		1	0
SP	~*~	SP		1	0	NA	NA	1	1		participant.p31	~1			0.929994	0	NA	NA	0.929994	0.929994		SP	~*~	SP		1	0	NA	NA	1	1		participant.p31	~1			0.929994	0	NA	NA	0.929994	0.929994		SP	~*~	SP		1	0
SP	~1			0	0	NA	NA	0	0		total	:=	c+a*b	total	-0.0930487	0.0160052	-5.81367	6.11192e-09	-0.124418	-0.0616792		SP	~1			0	0	NA	NA	0	0		total	:=	c+a*b	total	-0.0930487	0.0160052	-5.81367	6.11193e-09	-0.124418	-0.0616792		SP	~1			0	0
SBN_mean_cortical_volume	~1			1.69493	0.0398354	42.5483	0	1.61685	1.773		direct	:=	c	direct	-0.0913157	0.0159736	-5.71668	1.08626e-08	-0.122623	-0.0600081		SBN_mean_subcortical_volume	~1			1.75102	0.0402333	43.5215	0	1.67216	1.82987		direct	:=	c	direct	-0.0908687	0.0159829	-5.68537	1.30529e-08	-0.122195	-0.0595428		SBN_mean_FA	~1			2.36455	0.0432356
participant.p22189	~1			-0.767517	0	NA	NA	-0.767517	-0.767517		indirect	:=	a*b	indirect	-0.00173302	0.000777673	-2.22847	0.0258491	-0.00325723	-0.000208811		participant.p22189	~1			-0.767485	0	NA	NA	-0.767485	-0.767485		indirect	:=	a*b	indirect	-0.00217998	0.000838274	-2.60056	0.0093072	-0.00382297	-0.000536994		participant.p22189	~1			-0.76351	0
participant.p21003_i2	~1			8.38255	0	NA	NA	8.38255	8.38255		lhs	op	rhs	label	est.std	se	z	pvalue	ci.lower	ci.upper		participant.p21003_i2	~1			8.3828	0	NA	NA	8.3828	8.3828		lhs	op	rhs	label	est.std	se	z	pvalue	ci.lower	ci.upper		participant.p21003_i2	~1			8.36561	0
participant.p31	~1			0.960127	0	NA	NA	0.960127	0.960127													participant.p31	~1			0.960091	0	NA	NA	0.960091	0.960091													participant.p31	~1			0.9588	0
total	:=	c+a*b	total	-0.0517513	0.00592122	-8.73997	0	-0.0633567	-0.0401459													total	:=	c+a*b	total	-0.0517462	0.00592137	-8.73888	0	-0.0633518	-0.0401405													total	:=	c+a*b	total	-0.0504822	0.0059872
direct	:=	c	direct	-0.050922	0.00591687	-8.60624	0	-0.0625189	-0.0393252													direct	:=	c	direct	-0.0507447	0.00591876	-8.57354	0	-0.0623453	-0.0391442													direct	:=	c	direct	-0.0504462	0.00598721
indirect	:=	a*b	indirect	-0.000829256	0.000240439	-3.44893	0.000562809	-0.00130051	-0.000358005													indirect	:=	a*b	indirect	-0.00100143	0.000266047	-3.76412	0.000167137	-0.00152287	-0.00047999													indirect	:=	a*b	indirect	-3.59921e-05	0
lhs	op	rhs	label	est.std	se	z	pvalue	ci.lower	ci.upper													lhs	op	rhs	label	est.std	se	z	pvalue	ci.lower	ci.upper													lhs	op	rhs	label	est.std	se
[truncated: 34 more columns]

## Sheet: Supplementary Table 4
Supplementary Table 4: Mediation analyses, general intelligence
participant.p21003_i2 = Age at instance 2
participant.p31 = Sex
SP = Social Participation; OF = Occupational Function
SBN = Social Brain Network
lhs = left hand side; rhs = right hand side; op = operator; est.std = standardised estimate; se = standard error; z = Z-statistic; ci = confidence interval
g = predicted general intelligence
Townsend -> g pred -> SP											Townsend -> g pred -> OF
lhs	op	rhs	label	est.std	se	z	pvalue	ci.lower	ci.upper		lhs	op	rhs	label	est.std	se	z	pvalue	ci.lower	ci.upper
<chr>	<chr>	<chr>	<chr>	<dbl>	<dbl>	<dbl>	<dbl>	<dbl>	<dbl>		<chr>	<chr>	<chr>	<chr>	<dbl>	<dbl>	<dbl>	<dbl>	<dbl>	<dbl>
SP	~	participant.p22189	c	-0.0541853	0.0070311	-7.70651	1.28786e-14	-0.067966	-0.0404046		OF	~	participant.p22189	c	-0.085115	0.0190487	-4.46829	7.88472e-06	-0.12245	-0.0477803
SP	~	participant.p21003_i2		0.147132	0.00768983	19.1333	0	0.13206	0.162204		OF	~	participant.p21003_i2		0.0788788	0.0232145	3.39783	0.000679228	0.0333793	0.124378
SP	~	participant.p31		-0.176717	0.00692635	-25.5137	0	-0.190292	-0.163142		OF	~	participant.p31		-0.179933	0.0233744	-7.69787	1.37668e-14	-0.225746	-0.13412
g	~	participant.p22189	a	-0.061381	0.00620821	-9.88708	0	-0.0735489	-0.0492131		g	~	participant.p22189	a	-0.0770333	0.0104718	-7.35629	1.89182e-13	-0.0975576	-0.056509
g	~	participant.p21003_i2		-0.414964	0.00565759	-73.3464	0	-0.426052	-0.403875		g	~	participant.p21003_i2		-0.294615	0.010483	-28.1041	0	-0.315162	-0.274069
g	~	participant.p31		0.0453259	0.0064629	7.01324	2.32858e-12	0.0326588	0.0579929		g	~	participant.p31		0.0534195	0.0111241	4.80215	1.56972e-06	0.0316167	0.0752223
SP	~	g	b	0.0275652	0.00773145	3.56534	0.000363382	0.0124119	0.0427186		OF	~	g	b	0.120441	0.0200631	6.00309	1.93592e-09	0.0811179	0.159764
SP	|	t1		-1.44944	0.0755813	-19.1772	0	-1.59757	-1.3013		OF	|	t1		-2.9019	0.372043	-7.79991	6.21725e-15	-3.63109	-2.17271
SP	|	t2		-0.789894	0.0687266	-11.4933	0	-0.924596	-0.655193		OF	|	t2		-1.28844	0.242946	-5.30342	1.13653e-07	-1.76461	-0.812279
SP	|	t3		-0.204136	0.0673031	-3.03308	0.00242072	-0.336047	-0.072224		OF	|	t3		-1.24506	0.242289	-5.13874	2.76587e-07	-1.71994	-0.770184
SP	|	t4		0.411491	0.0664037	6.19681	5.76183e-10	0.281342	0.54164		OF	|	t4		2.57548	0.241468	10.6659	0	2.10221	3.04875
SP	|	t5		1.08509	0.065934	16.4573	0	0.955864	1.21432		OF	|	t5		3.28833	0.237869	13.8241	0	2.82211	3.75454
SP	|	t6		1.79228	0.0658053	27.2362	0	1.66331	1.92126		OF	~~	OF		0.947166	0.00956381	99.0365	0	0.928422	0.965911
SP	|	t7		2.52637	0.0661114	38.2138	0	2.39679	2.65594		g	~~	g		0.907343	0.00630972	143.801	0	0.894976	0.91971
SP	|	t8		3.27669	0.0678828	48.2697	0	3.14364	3.40973		participant.p22189	~~	participant.p22189		1	0	NA	NA	1	1
SP	|	t9		4.11414	0.0866134	47.5	0	3.94438	4.2839		participant.p22189	~~	participant.p21003_i2		-0.0118345	0	NA	NA	-0.0118345	-0.0118345
SP	|	t10		4.99768	0.243237	20.5465	0	4.52094	5.47441		participant.p22189	~~	participant.p31		-0.00480112	0	NA	NA	-0.00480112	-0.00480112
SP	~~	SP		0.950415	0.00301432	315.3	0	0.944507	0.956322		participant.p21003_i2	~~	participant.p21003_i2		1	0	NA	NA	1	1
g	~~	g		0.828855	0.00465831	177.93	0	0.819725	0.837985		participant.p21003_i2	~~	participant.p31		0.0772393	0	NA	NA	0.0772393	0.0772393
participant.p22189	~~	participant.p22189		1	0	NA	NA	1	1		participant.p31	~~	participant.p31		1	0	NA	NA	1	1
participant.p22189	~~	participant.p21003_i2		-0.0727746	0	NA	NA	-0.0727746	-0.0727746		OF	~*~	OF		1	0	NA	NA	1	1
participant.p22189	~~	participant.p31		-0.0174535	0	NA	NA	-0.0174535	-0.0174535		OF	~1			0	0	NA	NA	0	0
participant.p21003_i2	~~	participant.p21003_i2		1	0	NA	NA	1	1		g	~1			3.29533	0.108752	30.3014	0	3.08218	3.50848
participant.p21003_i2	~~	participant.p31		0.0867168	0	NA	NA	0.0867168	0.0867168		participant.p22189	~1			-0.566574	0	NA	NA	-0.566574	-0.566574
participant.p31	~~	participant.p31		1	0	NA	NA	1	1		participant.p21003_i2	~1			10.3943	0	NA	NA	10.3943	10.3943
SP	~*~	SP		1	0	NA	NA	1	1		participant.p31	~1			0.932875	0	NA	NA	0.932875	0.932875
SP	~1			0	0	NA	NA	0	0		total	:=	c+a*b	total	-0.0943929	0.0190776	-4.94783	7.50453e-07	-0.131784	-0.0570014
g	~1			3.44486	0.0483234	71.2876	0	3.35015	3.53957		direct	:=	c	direct	-0.085115	0.0190487	-4.46829	7.88472e-06	-0.12245	-0.0477803
participant.p22189	~1			-0.759854	0	NA	NA	-0.759854	-0.759854		indirect	:=	a*b	indirect	-0.00927796	0.00198662	-4.67023	3.00864e-06	-0.0131717	-0.00538426
participant.p21003_i2	~1			8.52001	0	NA	NA	8.52001	8.52001
participant.p31	~1			0.96873	0	NA	NA	0.96873	0.96873
total	:=	c+a*b	total	-0.0558773	0.00701604	-7.96421	1.55431e-15	-0.0696285	-0.0421261
direct	:=	c	direct	-0.0541853	0.0070311	-7.70651	1.28786e-14	-0.067966	-0.0404046
indirect	:=	a*b	indirect	-0.00169198	0.000504456	-3.35407	0.000796319	-0.0026807	-0.000703266
